# Supplementary material
Source: PubMed Central journal article supplement (PMC4323492)
Supplement: MCB.01020-14_zmb005150752so1.pdf [file MCB.01020-14_zmb005150752so1.pdf]

Table S1: Oligonucleotides used in this study

| Name    | Sequence                                                                                             | Description                                                                                                                                                                                                                                                                   |
|---------|------------------------------------------------------------------------------------------------------|-------------------------------------------------------------------------------------------------------------------------------------------------------------------------------------------------------------------------------------------------------------------------------|
| EDR262  | GCATCAGCACTGGTAACATTGG                                                                               | Antisense primer binding to nucleotides 689-710 of the <i>SUP35</i> open reading frame                                                                                                                                                                                        |
| EDR301  | CGTCACAGTGTTTCGAGTCTG                                                                                | Sense primer binding 398-379 nucleotides before the <i>SUP35</i> start codon                                                                                                                                                                                                  |
| EDR302  | GGCAGAATATCTGTCAACCACAC                                                                              | Sense primer binding 514-492 nucleotides before the <i>SUP35</i> start codon                                                                                                                                                                                                  |
| EDR304  | GTTTCGTA CTACCCTTTCTGG                                                                               | Antisense primer binding to nucleotides 1133-1112 of the <i>SUP35</i> open reading frame                                                                                                                                                                                      |
| EDR1314 | TCCTTTCAAGTTAGATATTGTTTTCCCTTCACTTAT<br>ATTCTATTTTCAGATTGTA CTGAGAGTGCACC                            | Sense primer to amplify HIS3 from pRS313. Used to knock out the <i>HIS3</i> gene in YER632/pJ533 to make YER709                                                                                                                                                               |
| EDR1315 | CTAAAAACCAATGTGCTTTCCAGGCAAAACCAATC<br>TTAGCAACAGCTACATAAGAACACCTTTGGTGGAG                           | Antisense primer to amplify HIS3 from pRS313. Used to knock out the <i>HIS3</i> gene in YER632/pJ533 to make YER709                                                                                                                                                           |
| EDR1377 | CTGGGTACCAACAAGGTGGCTATCAACAGTACAAT<br>NNBNNBNNBNNBNNBNNBNNBNNBNNBNNBCCTC<br>AAGGAGGCTACCAGCAATACAAC | Sense primer to mutagenize the third repeat of the Sup35 ORD. Spans nucleotides 158-249 of <i>SUP35</i> , but does not bind directly to the <i>SUP35</i> open reading frame. Requires pre-amplification with EDR1384 to make conservative changes that facilitate binding.    |
| EDR1380 | GCAAAACTACCAGCAATACAGCCAGAACGGTNNB<br>NNBNNBNNBNNBNNBNNBNNBTACCAAGGCTACC<br>AGGCTTACAATGC            | Sense primer to mutagenize amino acids 21-28 in the Sup35 ND. Spans nucleotides 30-110 of <i>SUP35</i> , but does not bind directly to the <i>SUP35</i> open reading frame. Requires pre-amplification with EDR1388 to make conservative changes that facilitate binding.     |
| EDR1384 | GAGGCTACCAGCAATACAACCCTCAAGGCGGTTAT<br>CAGCAGCAATTCAATCC                                             | Sense primer spanning nucleotides 230-281 of the <i>SUP35</i> open reading frame, making a series of conservative changes to facilitate binding by EDR1377.                                                                                                                   |
| EDR1385 | GATAGCCACCTTGTGGTACCCAG                                                                              | Antisense primer binding to nucleotides 181-158 of the <i>SUP35</i> open reading frame. Complementary to the non-degenerate 5' region of EDR1377.                                                                                                                             |
| EDR1388 | CAAGGCTACCAGGCTTACAATGCTCAAGCCCAACC<br>TG CAG                                                        | Sense primer spanning nucleotides 88-127 of the <i>SUP35</i> open reading frame, making a series of conservative changes to facilitate binding by EDR1380.                                                                                                                    |
| EDR1389 | GTTCTGGCTGTATTGCTGGTAGTTTTGCTGATTGTT<br>GCCTTGGTTTGAATCC                                             | Antisense primer binding to nucleotides 57-6 of the <i>SUP35</i> open reading frame. Complementary to the non-degenerate 5' region of EDR1380.                                                                                                                                |
| EDR1471 | CTGGGTACCAACAAGGTGGCTATCAACAGTACAAT<br>CCAGTTTATGATCATATTTATTATGCTTCTCCTCAA<br>GGAGGCTACCAGCAATACAAC | Sense to mutate the third repeat of the SUP35 ORD to PVYDHIYYAS. Spans nucleotides 158-249 of <i>SUP35</i> , but does not bind directly to the <i>SUP35</i> open reading frame. Requires pre-amplification with EDR1384 to make conservative changes that facilitate binding. |
| EDR1472 | CTGGGTACCAACAAGGTGGCTATCAACAGTACAAT<br>TATAATGGTATTAATGCTTATTTGTTTAATCCTCAA<br>GGAGGCTACCAGCAATACAAC | Sense to mutate the third repeat of the SUP35 ORD to YNGINAYLFN. Spans nucleotides 158-249 of <i>SUP35</i> , but does not bind directly to the <i>SUP35</i> open reading frame. Requires pre-amplification with EDR1384 to make conservative changes that facilitate binding. |
| EDR1473 | CTGGGTACCAACAAGGTGGCTATCAACAGTACAAT<br>ACTGCTAGATATGGTGCTGCTTTTGGTTATCCTCAA<br>GGAGGCTACCAGCAATACAAC | Sense to mutate the third repeat of the SUP35 ORD to TARYGAAFGY. Spans nucleotides 158-249 of <i>SUP35</i> , but does not bind directly to the <i>SUP35</i> open reading frame. Requires pre-amplification with EDR1384 to make conservative changes that facilitate binding. |
| EDR1480 | CTGGGTACCAACAAGGTGGCTATCAACAGTACAAT                                                                  | Sense to mutate the third repeat of the SUP35 ORD to LIVVIGFIPT. Spans nucleotides 158-249 of                                                                                                                                                                                 |

|         |                                                                                                               |                                                                                                                                                                                                                                                                                                                          |
|---------|---------------------------------------------------------------------------------------------------------------|--------------------------------------------------------------------------------------------------------------------------------------------------------------------------------------------------------------------------------------------------------------------------------------------------------------------------|
|         | TTGATTGTTGTTATTGGTTTTATTCCAACCTCCTCAA<br>GGAGGCTACCAGCAATACAAC                                                | <i>SUP35</i> , but does not bind directly to the <i>SUP35</i> open reading frame. Requires pre-amplification with EDR1384 to make conservative changes that facilitate binding.                                                                                                                                          |
| EDR1481 | CTGGGTACCAACAAGGTGGCTATCAACAGTACAAT<br>GATGATACTAATTTTAGATGTTTGATTAGACCTCA<br>AGGAGGCTACCAGCAATACAAC          | Sense to mutate the third repeat of the <i>SUP35</i> ORD to DDTNFRCLIR. Spans nucleotides 158-249 of <i>SUP35</i> , but does not bind directly to the <i>SUP35</i> open reading frame. Requires pre-amplification with EDR1384 to make conservative changes that facilitate binding.                                     |
| EDR1482 | CTGGGTACCAACAAGGTGGCTATCAACAGTACAAT<br>GGTAGAGTTTTGTTTAGAAATGGTATTGGTCCTCA<br>AGGAGGCTACCAGCAATACAAC          | Sense to mutate the third repeat of the <i>SUP35</i> ORD to GRVLFNRNGIG. Spans nucleotides 158-249 of <i>SUP35</i> , but does not bind directly to the <i>SUP35</i> open reading frame. Requires pre-amplification with EDR1384 to make conservative changes that facilitate binding.                                    |
| EDR1490 | CTGGGTACCAACAAGGTGGCTATCAACAGTACAAT<br>GGTGCTATTAATTATACTTATTGTGTTGCTCCTCAA<br>GGAGGCTACCAGCAATACAAC          | Sense to mutate the third repeat of the <i>SUP35</i> ORD to GAINYTYCVA. Spans nucleotides 158-249 of <i>SUP35</i> , but does not bind directly to the <i>SUP35</i> open reading frame. Requires pre-amplification with EDR1384 to make conservative changes that facilitate binding.                                     |
| EDR1491 | CTGGGTACCAACAAGGTGGCTATCAACAGTACAAT<br>TATAATATTACTTATGATGTTACTTATAATCCTCAA<br>GGAGGCTACCAGCAATACAAC          | Sense to mutate the third repeat of the <i>SUP35</i> ORD to YNITYDVITYN. Spans nucleotides 158-249 of <i>SUP35</i> , but does not bind directly to the <i>SUP35</i> open reading frame. Requires pre-amplification with EDR1384 to make conservative changes that facilitate binding.                                    |
| EDR1492 | CTGGGTACCAACAAGGTGGCTATCAACAGTACAAT<br>TTTATTGATTATGCTCCACCAAATGCTTATCCTCAA<br>GGAGGCTACCAGCAATACAAC          | Sense to mutate the third repeat of the <i>SUP35</i> ORD to FIDYAPPNAY. Spans nucleotides 158-249 of <i>SUP35</i> , but does not bind directly to the <i>SUP35</i> open reading frame. Requires pre-amplification with EDR1384 to make conservative changes that facilitate binding.                                     |
| EDR1493 | CTGGGTACCAACAAGGTGGCTATCAACAGTACAAT<br>ACTAGACCAGATCCAATTTGTAATTTGAGACCTCA<br>AGGAGGCTACCAGCAATACAAC          | Sense to mutate the third repeat of the <i>SUP35</i> ORD to TRPDPICNLR. Spans nucleotides 158-249 of <i>SUP35</i> , but does not bind directly to the <i>SUP35</i> open reading frame. Requires pre-amplification with EDR1384 to make conservative changes that facilitate binding.                                     |
| EDR1494 | CTGGGTACCAACAAGGTGGCTATCAACAGTACAAT<br>AGAGATATTTGTCCAAGAATTTTCCAGATCCTCA<br>AGGAGGCTACCAGCAATACAAC           | Sense to mutate the third repeat of the <i>SUP35</i> ORD to RDICPRIFPD. Spans nucleotides 158-249 of <i>SUP35</i> , but does not bind directly to the <i>SUP35</i> open reading frame. Requires pre-amplification with EDR1384 to make conservative changes that facilitate binding.                                     |
| EDR1495 | CTGGGTACCAACAAGGTGGCTATCAACAGTACAAT<br>TTGATTTTGGCTTTGAGAAATAATATTAATCCTCAA<br>GGAGGCTACCAGCAATACAAC          | Sense to mutate the third repeat of the <i>SUP35</i> ORD to LILALRNNIN. Spans nucleotides 158-249 of <i>SUP35</i> , but does not bind directly to the <i>SUP35</i> open reading frame. Requires pre-amplification with EDR1384 to make conservative changes that facilitate binding.                                     |
| EDR1890 | CAGCAGCAGTTCAACCCACAAGGTGGCCGTGGAA<br>ATTACAAAACTTC                                                           | Sense primer spanning nucleotides 265-312 of the <i>SUP35</i> open reading frame, making a series of conservative changes to facilitate binding of EDR1892-1895 and 2156-2158.                                                                                                                                           |
| EDR1891 | ACCGGCGTCGGGATTGTACTG                                                                                         | Antisense primer binding to nucleotides 204-184 of the <i>SUP35</i> open reading frame. Complementary to the 5' ends of EDR1892-1895 and 2156-2158.                                                                                                                                                                      |
| EDR1892 | CAGTACAATCCCGACGCCGGTTTTACAGCAACAATT<br>GAATCCTCAAGGAGGCTTACAACAATTGAATCCTC<br>AAGGCGGTTTACAGCAGCAGTTCAACCCAC | Sense primer to mutate the tyrosines in the third through fifth repeats of the <i>Sup35</i> ORD to leucine. Spans nucleotides 184-283 of <i>SUP35</i> , but does not bind directly to the <i>SUP35</i> open reading frame. Requires pre-amplification with EDR1890 to make conservative changes that facilitate binding. |
| EDR1893 | CAGTACAATCCCGACGCCGGTTCAGCAACAAGT<br>TAATCCTCAAGGAGGCGTACAACAAGTCAATCCTC<br>AAGGCGGTGTTTCAGCAGCAGTTCAACCCAC   | Sense primer to mutate the tyrosines in the third through fifth repeats of the <i>Sup35</i> ORD to valine. Spans nucleotides 184-283 of <i>SUP35</i> , but does not bind directly to the <i>SUP35</i> open reading frame. Requires pre-amplification with EDR1890 to make conservative changes that facilitate binding.  |
| EDR1894 | CAGTACAATCCCGACGCCGGTTTTTCAGCAACAATT                                                                          | Sense primer to mutate the tyrosines in the third through fifth repeats of the <i>Sup35</i> ORD to                                                                                                                                                                                                                       |

|         |                                                                                                               |                                                                                                                                                                                                                                                                                                                      |
|---------|---------------------------------------------------------------------------------------------------------------|----------------------------------------------------------------------------------------------------------------------------------------------------------------------------------------------------------------------------------------------------------------------------------------------------------------------|
|         | CAATCCTCAAGGAGGCTTTCAACAATTTAATCCTC<br>AAGGCGTTTTCCAGCAGCAGTTCAACCCAC                                         | phenylalanine. Spans nucleotides 184-283 of <i>SUP35</i> , but does not bind directly to the <i>SUP35</i> open reading frame. Requires pre-amplification with EDR1890 to make conservative changes that facilitate binding.                                                                                          |
| EDR1895 | CAGTACAATCCCGACGCCGGTATTTCAGCAACAAAT<br>CAATCCTCAAGGAGGCATACAACAAATTAATCCTC<br>AAGGCGGTATACAGCAGCAGTTCAACCCAC | Sense primer to mutate the tyrosines in the third through fifth repeats of the Sup35 ORD to isoleucine. Spans nucleotides 184-283 of <i>SUP35</i> , but does not bind directly to the <i>SUP35</i> open reading frame. Requires pre-amplification with EDR1890 to make conservative changes that facilitate binding. |
| EDR2156 | CAGTACAATCCCGACGCCGGTTGGCAGCAACAATG<br>GAATCCTCAAGGAGGCTGGCAACAATGGAATCCTC<br>AAGGCGGTTGGCAGCAGCAGTTCAACCCAC  | Sense primer to mutate the tyrosines in the third through fifth repeats of the Sup35 ORD to tryptophan. Spans nucleotides 184-283 of <i>SUP35</i> , but does not bind directly to the <i>SUP35</i> open reading frame. Requires pre-amplification with EDR1890 to make conservative changes that facilitate binding. |
| EDR2157 | CAGTACAATCCCGACGCCGGTGCACAGCAACAAG<br>CTAATCCTCAAGGAGGCGCACAACAAGCTAATCCT<br>CAAGGCGGTGCTCAGCAGCAGTTCAACCCAC  | Sense primer to mutate the tyrosines in the third through fifth repeats of the Sup35 ORD to alanine. Spans nucleotides 184-283 of <i>SUP35</i> , but does not bind directly to the <i>SUP35</i> open reading frame. Requires pre-amplification with EDR1890 to make conservative changes that facilitate binding.    |
| EDR2158 | CAGTACAATCCCGACGCCGGTATGCAGCAACAAAT<br>GAATCCTCAAGGAGGCATGCAACAATGAATCCTC<br>AAGGCGGTATGCAGCAGCAGTTCAACCCAC   | Sense primer to mutate the tyrosines in the third through fifth repeats of the Sup35 ORD to methionine. Spans nucleotides 184-283 of <i>SUP35</i> , but does not bind directly to the <i>SUP35</i> open reading frame. Requires pre-amplification with EDR1890 to make conservative changes that facilitate binding. |

Table S2: Plasmids

| Name    | Type | Markers                      | Description                                                                                                                                                                         | Experiment used                                              | Reference  |
|---------|------|------------------------------|-------------------------------------------------------------------------------------------------------------------------------------------------------------------------------------|--------------------------------------------------------------|------------|
| pER589  | cen  | <i>URA3, amp<sup>R</sup></i> | $P_{SUP35}$ - <i>SUP35MC</i> ; modified version of pJ533                                                                                                                            | Prion formation library experiments                          | This study |
| pJ533   | cen  | <i>URA3, amp<sup>R</sup></i> | $P_{SUP35}$ - <i>SUP35</i>                                                                                                                                                          | Prion maintenance library experiments                        | 1          |
| pJ526   | cen  | <i>LEU2, amp<sup>R</sup></i> | $P_{SUP35}$ - <i>GFP-SUP35MC</i>                                                                                                                                                    | Cloning vector for pER635-637, 642-650, 761-764, and 923-925 | 2          |
| pER1112 | cen  | <i>URA3, amp<sup>R</sup></i> | $P_{SUP35}$ - <i>SUP35-27</i> ; modified version of pJ533                                                                                                                           | Prion maintenance library experiments                        | This study |
| pER188  | cen  | <i>LEU2, amp<sup>R</sup></i> | $P_{SUP35}$ - <i>GFP-SUP35-27</i>                                                                                                                                                   | Fig. 3B                                                      | 2          |
| pER613  | cen  | <i>LEU2, amp<sup>R</sup></i> | Modified version of pJ526. Expresses from the <i>SUP35</i> promoter a modified version of Sup35 in which the third repeat of the ORD has been replaced with the sequence GGCNGEVFFH | Fig. 3B                                                      | This study |
| pER614  | cen  | <i>LEU2, amp<sup>R</sup></i> | Modified version of pJ526. Expresses from the <i>SUP35</i> promoter a modified version of Sup35 in which the third repeat of the ORD has been replaced with the sequence PHFALVHSTH | Fig. 3B                                                      | This study |
| pER615  | cen  | <i>LEU2, amp<sup>R</sup></i> | Modified version of pJ526. Expresses from the <i>SUP35</i> promoter a modified version of Sup35 in which the third repeat of the ORD has been replaced with the sequence VIVDRGQICG | Fig. 3B                                                      | This study |
| pER616  | cen  | <i>LEU2, amp<sup>R</sup></i> | Modified version of pJ526. Expresses from the <i>SUP35</i> promoter a modified version of Sup35 in which the third repeat of the ORD has been replaced with the sequence IDYSGRSLLL | Fig. 3B                                                      | This study |
| pER635  | cen  | <i>LEU2, amp<sup>R</sup></i> | Modified version of pJ526. Expresses from the <i>SUP35</i> promoter a modified version of Sup35 in which the third repeat of the ORD has been replaced with the sequence PVYDHIYYAS | Fig. 5                                                       | This study |
| pER636  | cen  | <i>LEU2, amp<sup>R</sup></i> | Modified version of pJ526. Expresses from the <i>SUP35</i> promoter a modified version of Sup35 in which the third repeat of the ORD has been replaced with the sequence YNGINAYLFN | Fig. 5                                                       | This study |
| pER637  | cen  | <i>LEU2, amp<sup>R</sup></i> | Modified version of pJ526. Expresses from the <i>SUP35</i> promoter a modified version of Sup35 in which the third repeat of the ORD has been replaced with the sequence TARYGAAFGY | Fig. 5                                                       | This study |
| pER642  | cen  | <i>LEU2, amp<sup>R</sup></i> | Modified version of pJ526. Expresses from the <i>SUP35</i> promoter a modified version of Sup35 in which the third repeat of the ORD has been replaced with the sequence LIVVIGFIPT | Fig. 5                                                       | This study |

|        |     |                              |                                                                                                                                                                                                             |        |            |
|--------|-----|------------------------------|-------------------------------------------------------------------------------------------------------------------------------------------------------------------------------------------------------------|--------|------------|
| pER643 | cen | <i>LEU2, amp<sup>R</sup></i> | Modified version of pJ526. Expresses from the <i>SUP35</i> promoter a modified version of Sup35 in which the third repeat of the ORD has been replaced with the sequence DDTNFRCLIR                         | Fig. 5 | This study |
| pER644 | cen | <i>LEU2, amp<sup>R</sup></i> | Modified version of pJ526. Expresses from the <i>SUP35</i> promoter a modified version of Sup35 in which the third repeat of the ORD has been replaced with the sequence GRVLFRRNGIG                        | Fig. 5 | This study |
| pER645 | cen | <i>LEU2, amp<sup>R</sup></i> | Modified version of pJ526. Expresses from the <i>SUP35</i> promoter a modified version of Sup35 in which the third repeat of the ORD has been replaced with the sequence GAINYTYCVA                         | Fig. 5 | This study |
| pER646 | cen | <i>LEU2, amp<sup>R</sup></i> | Modified version of pJ526. Expresses from the <i>SUP35</i> promoter a modified version of Sup35 in which the third repeat of the ORD has been replaced with the sequence YNITYDVTYN                         | Fig. 5 | This study |
| pER647 | cen | <i>LEU2, amp<sup>R</sup></i> | Modified version of pJ526. Expresses from the <i>SUP35</i> promoter a modified version of Sup35 in which the third repeat of the ORD has been replaced with the sequence FIDYAPPNAY                         | Fig. 5 | This study |
| pER648 | cen | <i>LEU2, amp<sup>R</sup></i> | Modified version of pJ526. Expresses from the <i>SUP35</i> promoter a modified version of Sup35 in which the third repeat of the ORD has been replaced with the sequence. TRPDICNLR                         | Fig. 5 | This study |
| pER649 | cen | <i>LEU2, amp<sup>R</sup></i> | Expresses from the <i>SUP35</i> promoter a modified version of Sup35 in which the third repeat of the ORD has been replaced with the sequence RDICPRIFPD                                                    | Fig. 5 | This study |
| pER650 | cen | <i>LEU2, amp<sup>R</sup></i> | Modified version of pJ526. Expresses from the <i>SUP35</i> promoter a modified version of Sup35 in which the third repeat of the ORD has been replaced with the sequence LILALRNNIN                         | Fig. 5 | This study |
| pER761 | cen | <i>LEU2, amp<sup>R</sup></i> | Modified version of pJ526. Expresses from the <i>SUP35</i> promoter a modified version of Sup35 in which the tyrosines in the third through fifth repeats of the ORD have been replaced with leucines       | Fig. 6 | This study |
| pER762 | cen | <i>LEU2, amp<sup>R</sup></i> | Modified version of pJ526. Expresses from the <i>SUP35</i> promoter a modified version of Sup35 in which the tyrosines in the third through fifth repeats of the ORD have been replaced with isoleucines    | Fig. 6 | This study |
| pER763 | cen | <i>LEU2, amp<sup>R</sup></i> | Modified version of pJ526. Expresses from the <i>SUP35</i> promoter a modified version of Sup35 in which the tyrosines in the third through fifth repeats of the ORD have been replaced with valines        | Fig. 6 | This study |
| pER764 | cen | <i>LEU2, amp<sup>R</sup></i> | Modified version of pJ526. Expresses from the <i>SUP35</i> promoter a modified version of Sup35 in which the tyrosines in the third through fifth repeats of the ORD have been replaced with phenylalanines | Fig. 6 | This study |
| pER923 | cen | <i>LEU2, amp<sup>R</sup></i> | Modified version of pJ526. Expresses from the <i>SUP35</i> promoter a modified version of Sup35 in which the tyrosines in the third through fifth repeats of the                                            | Fig. 6 | This study |

ORD have been replaced with tryptophans

|        |           |                              |                                                                                                                                                                                                              |                                                   |            |
|--------|-----------|------------------------------|--------------------------------------------------------------------------------------------------------------------------------------------------------------------------------------------------------------|---------------------------------------------------|------------|
| pER924 | cen       | <i>LEU2, amp<sup>R</sup></i> | Modified version of pJ526. Expresses from the <i>SUP35</i> promoter a modified version of Sup35 in which the tyrosines in the third through fifth repeats of the ORD have been replaced with alanines        | Fig. 6                                            | This study |
| pER925 | cen       | <i>LEU2, amp<sup>R</sup></i> | Modified version of pJ526. Expresses from the <i>SUP35</i> promoter a modified version of Sup35 in which the tyrosines in the third through fifth repeats of the ORD have been replaced with methionines     | Fig. 6                                            | This study |
| pKT24  | 2 $\mu$ m | <i>TRP1, amp<sup>R</sup></i> | Vector for building induction plasmids. Contains the <i>GALI</i> promoter and <i>ADHI</i> terminator, with a multiple cloning site in between.                                                               | Fig. 6C, E; Cloning vector for induction plasmids | 2          |
| pER548 | 2 $\mu$ m | <i>TRP1, amp<sup>R</sup></i> | Modified version of pKT24. Expresses Sup35NM (the N-terminal PFD and middle domain) from the <i>GALI</i> promoter                                                                                            | Fig. 6C, E                                        | 2          |
| pER756 | 2 $\mu$ m | <i>TRP1, amp<sup>R</sup></i> | Modified version of pKT24. Expresses from the <i>GALI</i> promoter a modified version of Sup35NM in which the tyrosines in the third through fifth repeats of the ORD have been replaced with leucines       | Fig. 6C, E                                        | This study |
| pER757 | 2 $\mu$ m | <i>TRP1, amp<sup>R</sup></i> | Modified version of pKT24. Expresses from the <i>GALI</i> promoter a modified version of Sup35NM in which the tyrosines in the third through fifth repeats of the ORD have been replaced with isoleucines    | Fig. 6C, E                                        | This study |
| pER758 | 2 $\mu$ m | <i>TRP1, amp<sup>R</sup></i> | Modified version of pKT24. Expresses from the <i>GALI</i> promoter a modified version of Sup35NM in which the tyrosines in the third through fifth repeats of the ORD have been replaced with valines        | Fig. 6C, E                                        | This study |
| pER759 | 2 $\mu$ m | <i>TRP1, amp<sup>R</sup></i> | Modified version of pKT24. Expresses from the <i>GALI</i> promoter a modified version of Sup35NM in which the tyrosines in the third through fifth repeats of the ORD have been replaced with phenylalanines | Fig. 6C, E                                        | This study |
| pER926 | 2 $\mu$ m | <i>TRP1, amp<sup>R</sup></i> | Modified version of pKT24. Expresses from the <i>GALI</i> promoter a modified version of Sup35NM in which the tyrosines in the third through fifth repeats of the ORD have been replaced with tryptophans    | Fig. 6C, E                                        | This study |
| pER955 | 2 $\mu$ m | <i>TRP1, amp<sup>R</sup></i> | Modified version of pKT24. Expresses from the <i>GALI</i> promoter a modified version of Sup35NM in which the tyrosines in the third through fifth repeats of the ORD have been replaced with alanines       | Fig. 6C, E                                        | This study |
| pER956 | 2 $\mu$ m | <i>TRP1, amp<sup>R</sup></i> | Modified version of pKT24. Expresses from the <i>GALI</i> promoter a modified version of Sup35NM in which the tyrosines in the third through fifth repeats of the ORD have been replaced with methionines    | Fig. 6C, E                                        | This study |
| pER760 | 2 $\mu$ m | <i>TRP1, amp<sup>R</sup></i> | Expresses yeast-optimized GFP (3) from the <i>GALI</i> promoter. Contains BamHI and XhoI restrictions sites immediately before GFP to allow for in-frame GFP fusions.                                        | Fig. 6B; Cloning vector for all GFP fusions       | 4          |
| pER851 | 2 $\mu$ m | <i>TRP1, amp<sup>R</sup></i> | Modified version of pER760, expressing Sup35NM-GFP from the <i>GALI</i> promoter.                                                                                                                            | Fig. 6B                                           | 4          |

|         |           |                              |                                                                                                                                                                                                                    |         |            |
|---------|-----------|------------------------------|--------------------------------------------------------------------------------------------------------------------------------------------------------------------------------------------------------------------|---------|------------|
| pER1003 | 2 $\mu$ m | <i>TRP1, amp<sup>R</sup></i> | Modified version of pER760. Expresses from the <i>GALI</i> promoter a modified version of Sup35NM-GFP in which the tyrosines in the third through fifth repeats of the Sup35 ORD have been replaced with leucines. | Fig. 6B | This study |
| pER1004 | 2 $\mu$ m | <i>TRP1, amp<sup>R</sup></i> | Modified version of pER760. Expresses from the <i>GALI</i> promoter a modified version of Sup35NM-GFP in which the tyrosines in the third through fifth repeats of the ORD have been replaced with isoleucines     | Fig. 6B | This study |
| pER1006 | 2 $\mu$ m | <i>TRP1, amp<sup>R</sup></i> | Modified version of pER760. Expresses from the <i>GALI</i> promoter a modified version of Sup35NM-GFP in which the tyrosines in the third through fifth repeats of the ORD have been replaced with alanines        | Fig. 6B | This study |
| pER1007 | 2 $\mu$ m | <i>TRP1, amp<sup>R</sup></i> | Modified version of pER760. Expresses from the <i>GALI</i> promoter a modified version of Sup35NM-GFP in which the tyrosines in the third through fifth repeats of the ORD have been replaced with methionines     | Fig. 6B | This study |
| pER1015 | 2 $\mu$ m | <i>TRP1, amp<sup>R</sup></i> | Modified version of pER760. Expresses from the <i>GALI</i> promoter a modified version of Sup35NM-GFP in which the tyrosines in the third through fifth repeats of the ORD have been replaced with tryptophan      | Fig. 6B | This study |
| pER1035 | 2 $\mu$ m | <i>TRP1, amp<sup>R</sup></i> | Modified version of pER760. Expresses from the <i>GALI</i> promoter a modified version of Sup35NM-GFP in which the tyrosines in the third through fifth repeats of the ORD have been replaced with phenylalanines  | Fig. 6B | This study |
| pER1238 | 2 $\mu$ m | <i>TRP1, amp<sup>R</sup></i> | Modified version of pER760. Expresses from the <i>GALI</i> promoter a modified version of Sup35NM-GFP in which the tyrosines in the third through fifth repeats of the ORD have been replaced with valines         | Fig. 6B | This study |

Plasmids are listed in the order that they appear in the text.

## References

1. **Song, Y., Y. X. Wu, G. Jung, Y. Tutar, E. Eisenberg, L. E. Greene, and D. C. Masison.** 2005. Role for Hsp70 chaperone in *Saccharomyces cerevisiae* prion seed replication. *Eukaryot. Cell* **4**:289-97.
2. **Ross, E. D., H. K. Edskes, M. J. Terry, and R. B. Wickner.** 2005. Primary sequence independence for prion formation. *Proc. Natl. Acad. Sci. USA* **102**:12825-12830.
3. **Cormack, B. P., G. Bertram, M. Egerton, N. A. Gow, S. Falkow, and A. J. Brown.** 1997. Yeast-enhanced green fluorescent protein (yEGFP) a reporter of gene expression in *Candida albicans*. *Microbiology* **143**:303-11.
4. **Gonzalez Nelson, A. C., K. R. Paul, M. Petri, N. Flores, R. A. Rogge, S. M. Cascarina, and E. D. Ross.** 2014. Increasing prion propensity by hydrophobic insertion. *PLoS ONE* **9**:e89286.

Table S3. Sequences of the mutagenized region from each library. Asterisks indicate non-propagating clones that were analyzed for presence of a species barrier.

| Prion formation libraries |                             |             |                             | Prion propagation libraries       |                                     |                                                                |                                     |
|---------------------------|-----------------------------|-------------|-----------------------------|-----------------------------------|-------------------------------------|----------------------------------------------------------------|-------------------------------------|
| ND Library                |                             | ORD library |                             | Standard method                   |                                     | With preselection for ability to add onto wild-type aggregates |                                     |
| Unselected                | [ <i>PSI</i> <sup>+</sup> ] | Unselected  | [ <i>PSI</i> <sup>+</sup> ] | Red ([ <i>psi</i> <sup>-</sup> ]) | White ([ <i>PSI</i> <sup>+</sup> ]) | Red ([ <i>psi</i> <sup>-</sup> ])                              | White ([ <i>PSI</i> <sup>+</sup> ]) |
| LIARSNHC                  | RNVFLVGL                    | PTDVCASFVR  | FYGVLVCHVV                  | RGVYCAVIGA                        | PYSYVRCSCD                          | VAFITAYFRF                                                     | SYISGSNVVR                          |
| LRGGGGHI                  | YHMIGVVW                    | RVFGVSFGVV  | YYPIVVTGTS                  | NFRPLHAVAR                        | YTGGISAAGT                          | CSAPYNYFSY                                                     | GALNNFDLSH                          |
| LRIILDGA                  | GFFTSSVF                    | SGGIHRTGYG  | FHGAFSAVAG                  | LYTYDASMAF                        | CPCAPLGCDW                          | MVLHNFASHF                                                     | SCPRRSGSNG                          |
| RRAYFSLP                  | GYLSSCVF                    | RGLCRWQGES  | STVYMCASGN                  | SRIRRRTSFH                        | IVAPVHGWSC                          | DMYSFYGGEL                                                     | NRPAFFPHRD                          |
| CGAHDGGR                  | GGTFIFGC                    | LIGAGATGPF  | VGGVFVCNLR                  | AHCSGFSGRV                        | HYAAGYPCAS                          | VFSGFYYFSI                                                     | NGPGCAIRNT                          |
| LTWLWTLT                  | VNRVTCNV                    | AFCRAGAFD   | TFNIYPNGVH                  | VWCRGSVDAL                        | VYDRRGVGRE                          | NLCCGWVHGA                                                     | GHS DHSQVRC                         |
| CVCCGLDG                  | AITICGGV                    | PFNHLACVEL  | GII FGFHSYY                 | HARTSMDHLA                        | VRSGYYLYNY                          | AIPVVFHMCC                                                     | FAGGRIGPDI                          |
| SCGSNVML                  | FVGAFGIF                    | SGAALVDLCS  | ADFHVSGYG                   | RHDITVNFGD                        | SGSFCSFGRY                          | TFHCAHAAQS                                                     | DAVYGCTRKS                          |
| RYGSALWC                  | YISVYVAG                    | IIRFIERDRH  | NFSSYPGRVY                  | IDHVISDSFR                        | LPGYGNHEFV                          | VNVLWVSHNA                                                     | VAACSFLADL                          |
| AYNVSQRF                  | CGYFNAYC                    | TLSRYCVHSP  | ADSCFLG AFC                 | YAVVGSANHC                        | QFCQASFSAG                          | NGFCVCSFTR                                                     | VAGSRV ECV                          |
| PIRGNVLM                  | RDAIYYSR                    | YSIGCGVYTR  | TAGGLSMDIS                  | SRCSHV SISR                       | HHVPWVSTNC                          | SFGFRYCAFS                                                     | VTIHARNGND                          |
| SLHYLGWG                  | TGNGG PGL                   | DMAQGYGHGC  | IAALYVPMMSG                 | RFGGTD D D V D V                  | SPTPGLYAAS                          | IGHPYRHTG                                                      | RGERMGVYVG                          |
| TRIRRICV                  | GACNGLFV                    | SSIRPNPSAY  | CAENLIGWFN                  | FAISRSVLRG                        | DGYHFCQWDC                          | NLYDFYFSSR                                                     | YHDDADSEGV                          |
| DHALGDWG                  | TSYVFGPC                    | YDYRYSSYAA  | LLSCGIGSFA                  | HYVVASGDRR                        | PLRGFYHAF                           | GISVAHL PFF                                                    | SVVNVSDVSG                          |
| RVVRASPS                  | GLICHIYN                    | RAFRGVDNTW  | SFLYFDVCA                   | RRSTAVMHVA                        | GFYYSGIRD T                         | I IHFSVGS AF                                                   | GGLVMDVTH                           |
| QCASTGIS                  | NVMWLTSG                    | VIRGFCVSGR  | HLCFDSNRCH                  | RRTRTRV RCT                       | GSNGYPGNCW                          | GHYGWFLGSF                                                     | FYGVVSCYSR                          |
| IGSQSPCA                  | FHVEIYLN                    | VYRLSGYGGL  | YCLCTGRSHK                  | RAGVDHSSRG                        | DVFASIYRAC                          | YFCSGHGGVF                                                     | DASHAISYCL                          |
| SRGDRSSG                  | DFCASYVI                    | CCRIRGGYGL  | LYTWTSSGFY                  | GALVPD T SLL                      | SNRCPAYRSS                          | GCCTYGVNY                                                      | PVNGCGCVGV                          |
| FVLARRTG                  | LIFGISTV                    | AGCAIVIIPC  | DLVWPFGMSA                  | WDFSVDAALG                        | LFTLRF PFSV                         | SFEHHI INLC                                                    | DALGVDLCGD                          |
| GIRDCGC                   | HWLFCFGN                    | IVCRVFDELS  | SPYTI FRGSM                 | GCRSRINGFN                        | SHYMSGVASD                          |                                                                | GCDVSDDCD                           |
| GCSWQPSL                  | SSGSICVS                    | DTVIFYDKWR  | GCCNDVLF PY                 | SPGIFRGSAL                        | SFEGNVL RHP                         |                                                                | GTNYVCGYVV                          |
| GNPYDGGP                  | GCSWQPSL                    | WSCDGNICLI  | VNVTVRAAAR                  | RSGWRSRGSV                        | TFYTNS SAPV                         |                                                                | IGTRATPGVD                          |
| GRVYPVCV                  | IHIHNSGR                    | CGSFGDVTGF  | ASCNCR LGGP                 | FYSVSILDRR*                       | WDLCGDVALG                          |                                                                | ACASYGRYVC                          |
| SGVTGSDY                  | SALGHNV S                   | VVLPCISTKY  | GGCLNH FHAC                 | GCPRVVIHVD*                       | FLGIGSLCAG                          |                                                                | FRRGSLCPGD                          |
| PNSCRLTG                  | TYFDQYGC                    | GYRHGPPCYA  | NAGRSPCHTS                  | ADACLSLVSV                        | HGDTSYADAS                          |                                                                | GNFSDAMLDS                          |
| TIGDGNVR                  | SLTTCFCA                    | ASGSGRRAS   | GDGCGGFHCA                  | AVRSRRREN R                       | ACSGGHAGTT                          |                                                                | RGDVL PVDNV                         |
| YGGLMHRL                  | TVFFIGDL                    | WATVDDDHGD  | IGTQFDSYRA                  | NRYSIHNGV                         | RDLSGYFDGG                          |                                                                |                                     |
| QASGGYVD                  | IFTTHFSR                    | FRGAYFEYGI  | SNARRAWCFS                  | ATCIDSSTNS                        | VVSPSLGATT                          |                                                                |                                     |



|          |          |            |            |             |             |  |  |
|----------|----------|------------|------------|-------------|-------------|--|--|
| CVSGGCIS | IAISYVNA | VTHGGHGGWV | SSGIYLSPPG | TLDACYVCRR  | SWNFYPCCHGY |  |  |
| CSPHSGSG | SATYSMVC | KLTGGCTDAI | VDHECACRAS | ASRIKRPLGE  | VGNVGGWVAV  |  |  |
| NVERFYGF | PTHAFENS | GSVPIYGD   | AGFSHYWIP  | RVFGGGRACR* | YVCGHIDVFD  |  |  |
| SNYPSCFI | VVFLYSDV | SHTFGAVACR |            | PRPNVISFGA  | YANYDPSHCT  |  |  |
| VVFLGQ   | GTGSIYFL | VVPCRALFD  |            | LVRVFSPPHS* | CGFSVFGVGR  |  |  |
| YICISMD  | LVIAGDIS | IDFSLNRALA |            | YDADVFP     | CSCLVTGFEP  |  |  |
| LYVITNFI | DIFRNCFY | TIGVLSVRGA |            | VVSVSDGIWC* | DCFRYCLSGV  |  |  |
| RCGCGRGP | PNVVSVM  | SERCFVS    |            | PVGGNFVAAG* | GACVAACFGA  |  |  |
| GSNDLDT  | GFVLAFDV | NHGITGSVMF |            | VRVTFLNRNG  | DCVSRQTFGG  |  |  |
| WGCPSSGH |          | HSAPLRPALT |            | NSDCVACFLS* | YSLYGSFYPS  |  |  |
| SNSSCANL |          | DNSHPDFFAK |            | VPSYRRCVV   | VYASCVWSRI  |  |  |
| DVTSSLLM |          | RRVCIVGLFM |            | DPHPSTGDCF* | CDHGSYFDCG  |  |  |
| CDLECVGR |          | LVDSHSWCSM |            | GGCNGEVFFH* | CAFGSLRSSV  |  |  |
| YTLRTWRL |          | GPDHGGVPR  |            | LSAGVFGCAV* | PYPDCAYGSV  |  |  |
| YGRHTDAC |          | KRCHRGSRY  |            | RPAIARDNVG* | IRVSYHSPAP  |  |  |
| SSAFFRCV |          | IRVSYHSPAP |            | PHFALVHSTH* | LYFNRGSSRA  |  |  |
| QSADFSAF |          | LKISFNRPFS |            | VIVDRGQICG* | DHAHGI PRSC |  |  |
| GAYQGPV  |          | RTASGGELPL |            | IDYSGRSLLL* | PNGSHIIFSF  |  |  |
| SSVIRYFA |          | FSLWISYCRP |            | IAIVGFGGTG  | VLESSSFERF  |  |  |
| FGTRGTYG |          | RLPGYDDYIL |            | PGDRGLSRAR  | GNCGLHDER   |  |  |
| REDAGCNC |          | GPDSCTGRFN |            | HSVRRCTLR   | ACSAEHRWGL  |  |  |
| GGTFIFGC |          | NSYCSHLVRS |            | DSRLLRPGCS  | TAAVRNFGAS  |  |  |
| HGSGHVAI |          | FSGTRGDNGR |            | HDTLCNGVRF  | VAAAIRTAQT  |  |  |
| HFHIGSYG |          | SLVGSSFISR |            | RVSGVSLHL   | NSIRAGSCNL  |  |  |
| VRGRIICV |          | YGLTGYPLCL |            | FGRSLNSFRY  | GITFFGDASG  |  |  |
| VGDVVGVA |          | PCVCIHFRRR |            | PRIGHSDLVN  | SSTNYDYHRA  |  |  |
| SCGEPGLT |          | PVYAHGGRR  |            | PAGDDRNFVS  | AANTHREWCF  |  |  |
| RIGSPAVG |          | AFDSYNSVAI |            | HCYCHRAVAR  | LYPLFVVDTV  |  |  |
| NGVSGAAF |          | IDGMGRSSVG |            | ANLVVHCVTQ  | CIDNVCRSWG  |  |  |
| GSGLVRWG |          | VRGAWPHCSG |            | RPVTRGHRYH  | CIPDRYDCSA  |  |  |
| PGGDWLSM |          |            |            | RGPTSGPSGD  | YGPPSVSVGD  |  |  |
| VFRTGYMH |          |            |            | YPRISHGGQC  | SVGVAEFDRA  |  |  |
| GSSIGRIT |          |            |            | EITVMIAMSR  | FDYFFNGDNT  |  |  |
| FGARGVGL |          |            |            | PRVVVILNL   | HVNFVAVAVH  |  |  |
|          |          |            |            | DFRRHRHLGF  | FVVLASRCAY  |  |  |
|          |          |            |            | PQCDTSSSCG  | VSVGSCVPGC  |  |  |

|  |  |  |  |            |            |  |  |
|--|--|--|--|------------|------------|--|--|
|  |  |  |  | FGVPCVNVFV | DYVSGANHNS |  |  |
|  |  |  |  | PDNVVGNPPS |            |  |  |
|  |  |  |  | VVRPGLSDRS |            |  |  |
|  |  |  |  | CSGFLDDRCI |            |  |  |
|  |  |  |  | FMYGRDTRVS |            |  |  |
|  |  |  |  | PNHYRFGAVC |            |  |  |
|  |  |  |  | IIIVPSDRAL |            |  |  |
|  |  |  |  | LVRYFNVGDC |            |  |  |
|  |  |  |  | RKFAFSDSAG |            |  |  |
|  |  |  |  | LGASVYLVSG |            |  |  |
|  |  |  |  | ATSLTVLGNG |            |  |  |
|  |  |  |  | DTVGALHTRV |            |  |  |
|  |  |  |  | CHARGGCLVR |            |  |  |
|  |  |  |  | FAYFSVGSIT |            |  |  |
|  |  |  |  | RRKGYCGGFL |            |  |  |
|  |  |  |  | GYGGTVGFAH |            |  |  |
|  |  |  |  | IGCTSISLAP |            |  |  |
|  |  |  |  | RGSVTHGVGQ |            |  |  |
|  |  |  |  | SLSARVYCIS |            |  |  |
|  |  |  |  | VIGRSARYLL |            |  |  |
|  |  |  |  | DLELDVRTDM |            |  |  |
|  |  |  |  | IDDCMPPGDL |            |  |  |
|  |  |  |  | QSAFDDVPDL |            |  |  |
